# Supplementary material for: Structural diversity in the host–guest complexes of the antifolate pemetrexed with native cyclodextrins: gas phase, solution and solid state studies
Source: PubMed Central journal article supplement (PMC5669224; doi:10.3762/bjoc.13.222), 2017-10-25
Supplement: Beilstein_J_Org_Chem-13-2252-s001.pdf [file Beilstein_J_Org_Chem-13-2252-s001.pdf]

# Supporting Information

for

## Structural diversity in the host–guest complexes of the antifolate pemetrexed with native cyclodextrins: gas phase, solution and solid state studies

Magdalena Ceborska<sup>\*1</sup> Magdalena Zimnicka<sup>2</sup> Aneta Aniela Kowalska<sup>1</sup>, Kajetan Dąbrowa<sup>2</sup> and Barbara Repeć<sup>2</sup>

Address: <sup>1</sup>Institute of Physical Chemistry, Polish Academy of Sciences, Kasprzaka 44/52, 01-224 and

<sup>2</sup>Institute of Organic Chemistry, Polish Academy of Sciences, Kasprzaka 44/52, 01-224 Warsaw,

Poland

Email: Magdalena Ceborska - mceborska@ichf.edu.pl

\*Corresponding author

### Copies of MS, UV, NMR, IR and Raman spectra.

#### Contents

|                                                                                                              |    |
|--------------------------------------------------------------------------------------------------------------|----|
| 1. Copies of the mass spectra for $\alpha$ -, $\beta$ -, and $\gamma$ -CD complexes with a PTX dianion ..... | 2  |
| 2. UV–vis .....                                                                                              | 4  |
| 3. <sup>1</sup> H and 2D NMR spectra in D <sub>2</sub> O .....                                               | 6  |
| 4. <sup>1</sup> H spectra in DMSO- <i>d</i> <sub>6</sub> .....                                               | 13 |
| 5. FTIR-ATR and Raman.....                                                                                   | 20 |

# 1. Copies of the mass spectra for $\alpha$ -, $\beta$ -, and $\gamma$ -CD complexes with a PTX dianion

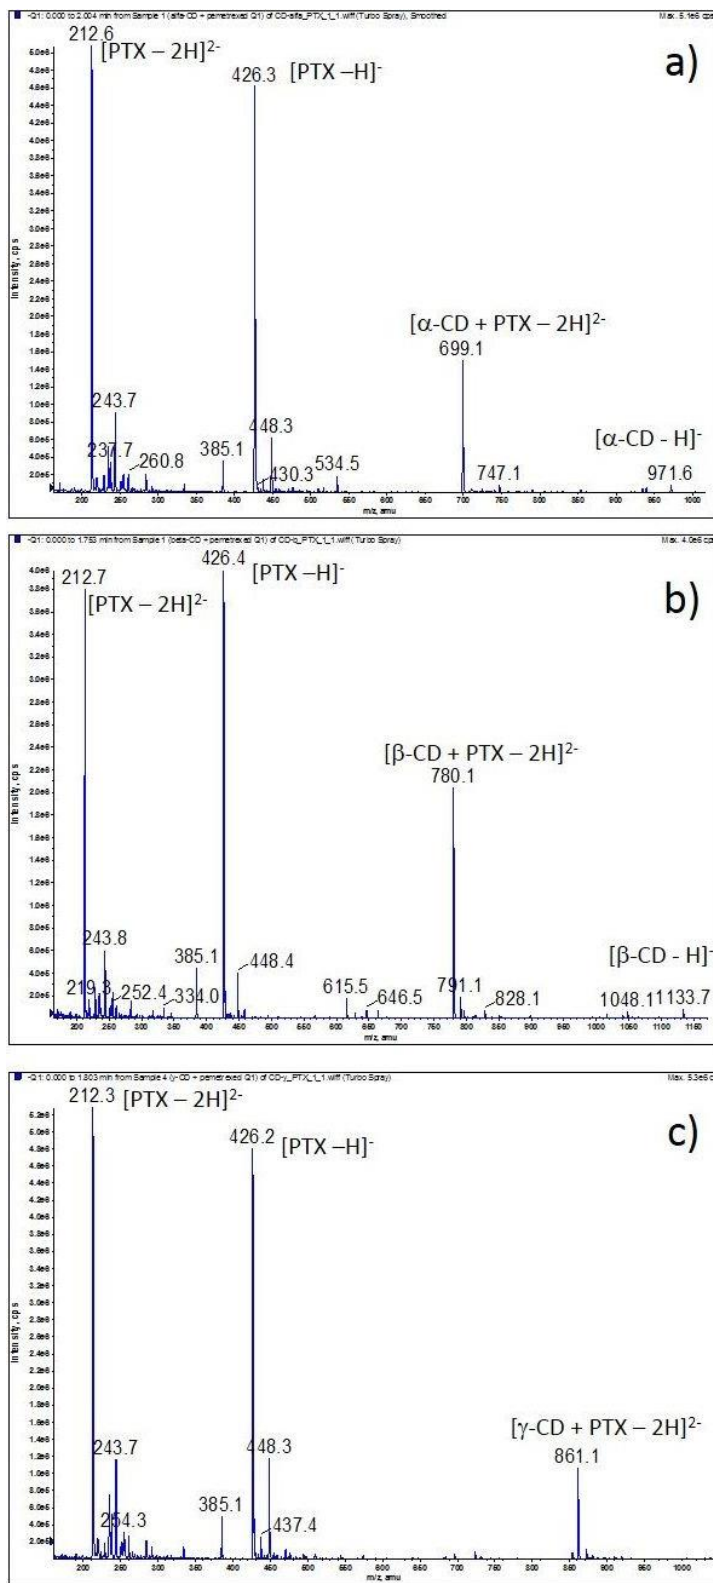

**Figure S1.** Negative-ESI mass spectra (Q1) of solutions containing: a)  $\alpha$ -CD/PTX, b)  $\beta$ -CD/PTX, and c)  $\gamma$ -CD/PTX.

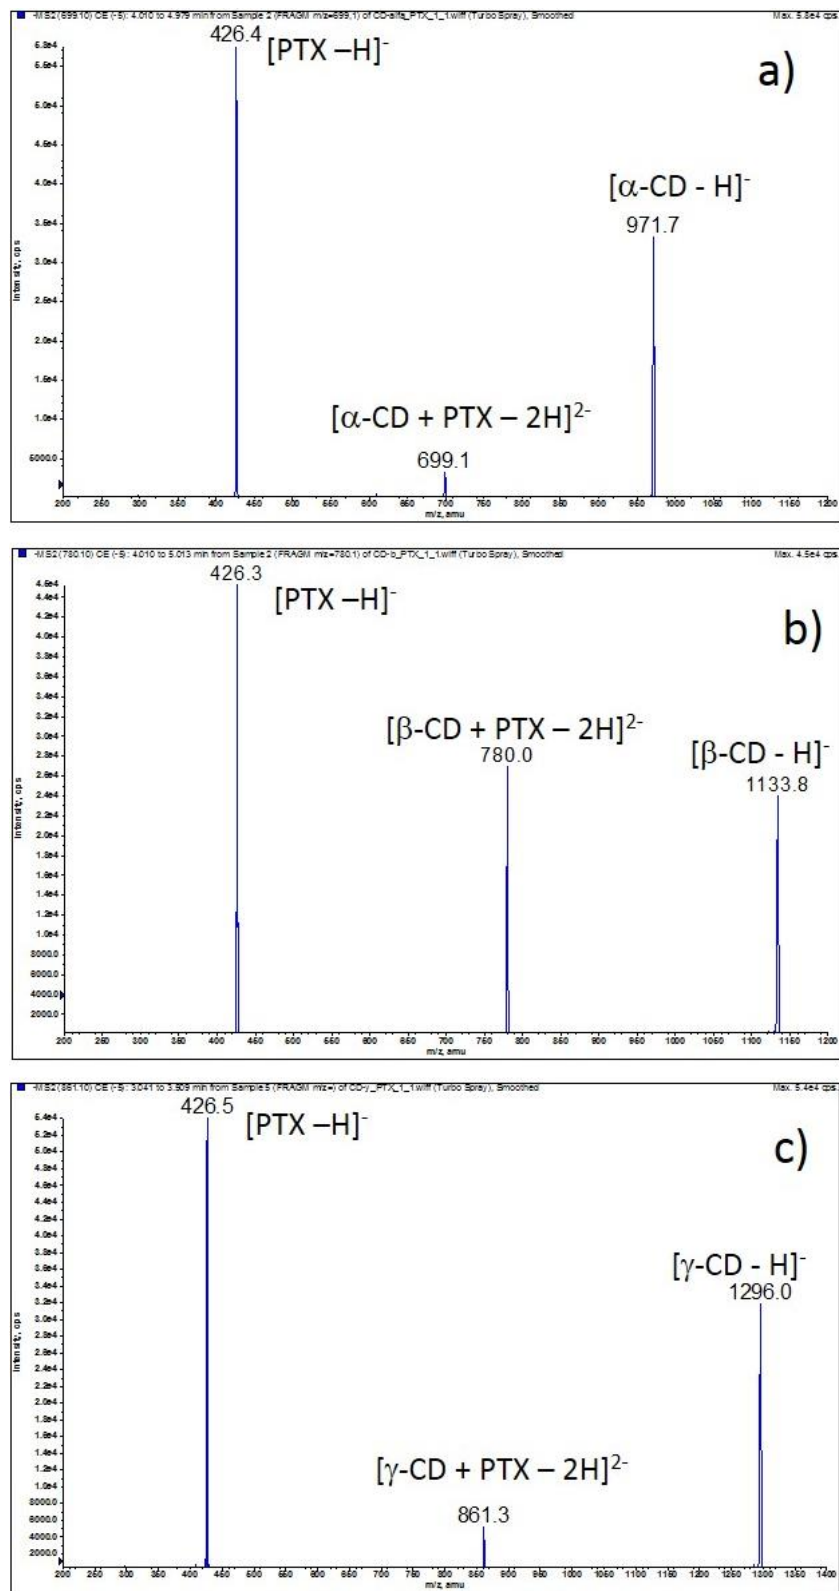

**Figure S2.** CID spectra of gas-phase complexes of a)  $\alpha$ -CD/PTX, b)  $\beta$ -CD/PTX, and c)  $\gamma$ -CD/PTX.

## 2. Ultra-Visible Spectroscopy (UV-VIS)

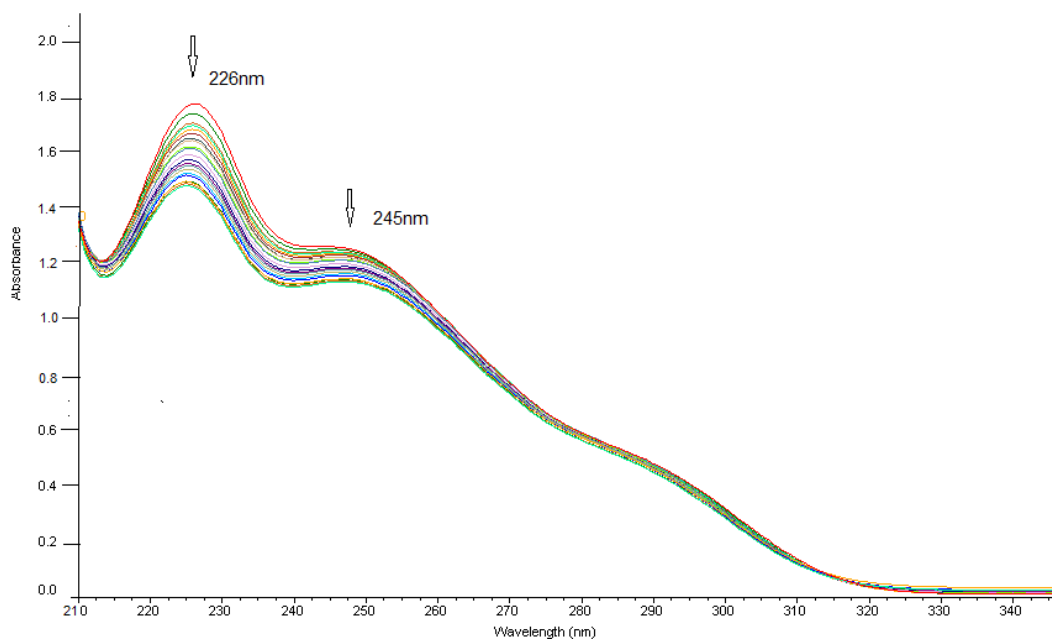

**Figure S3.** Absorption spectra of PTX upon titration with  $\beta$ -CD.

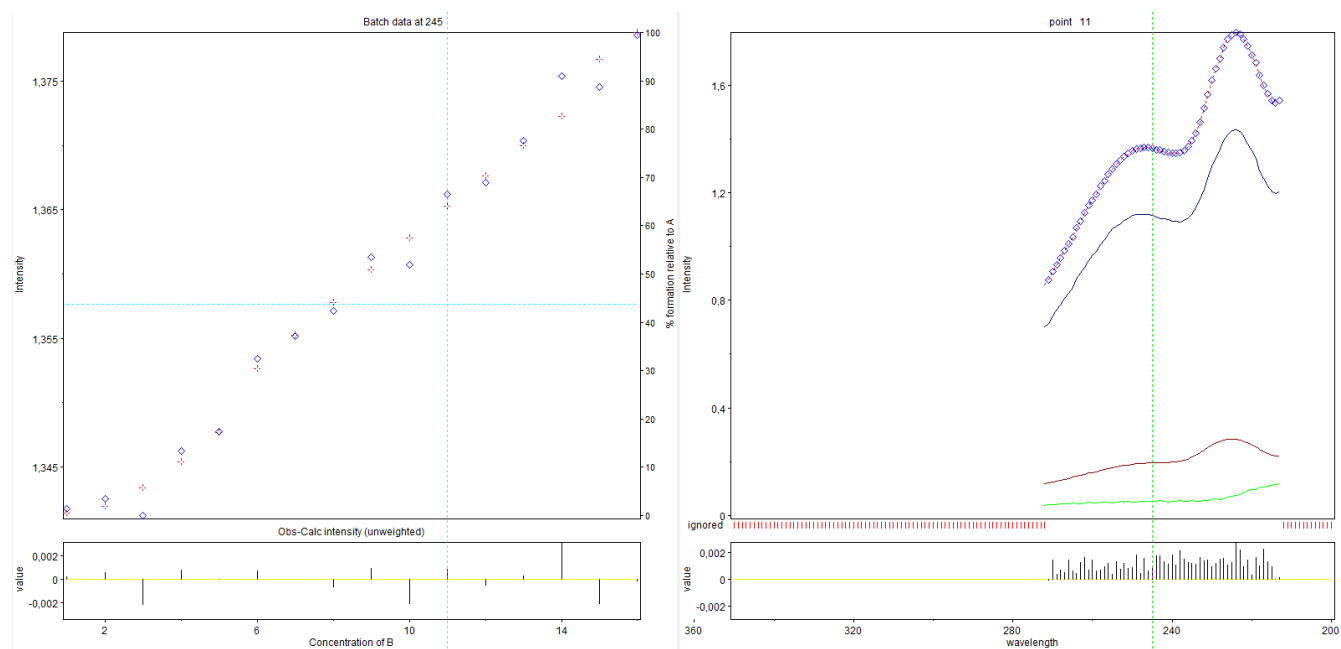

**Figure S4.** Titration plot for titration of PTX with  $\beta$ -CD (shown at  $\lambda = 245$  (left) and for 11th titration point (right).

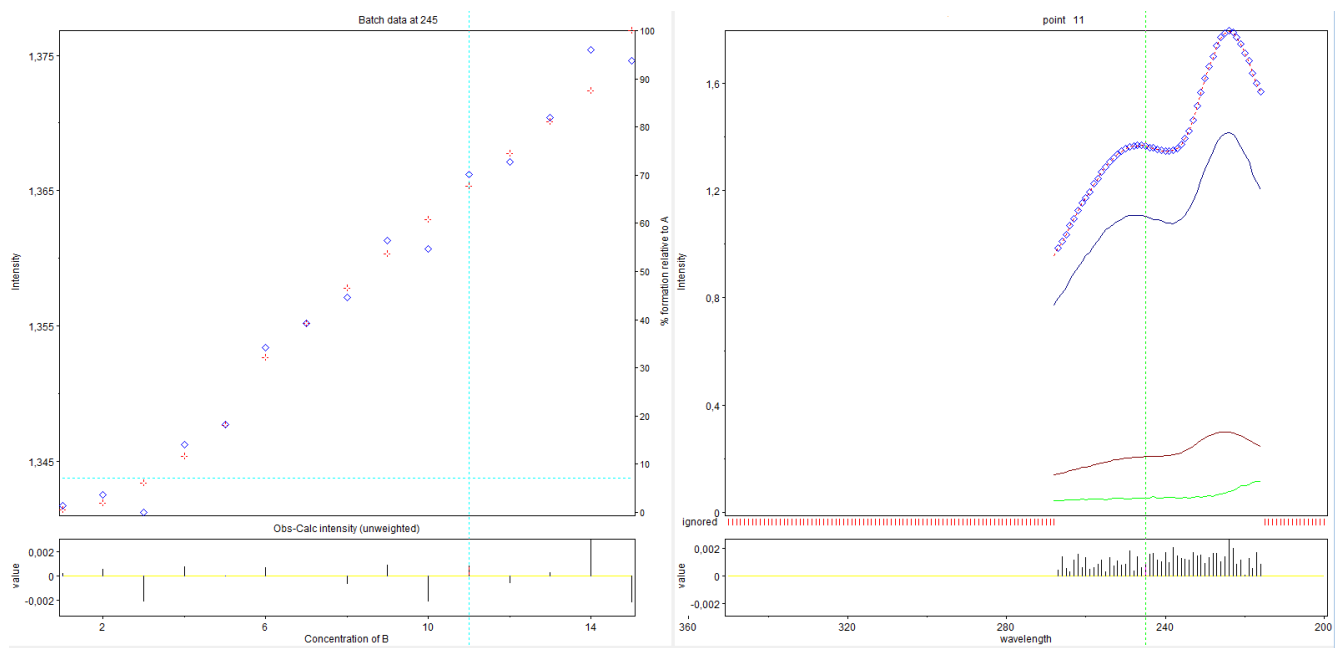

**Figure S5.** Titration plot for titration of PTX with  $\gamma$ -CD (shown at  $\lambda = 245$  (left) and for the 11th titration point (right).

### 3. $^1\text{H}$ and 2D NMR spectra in $\text{D}_2\text{O}$

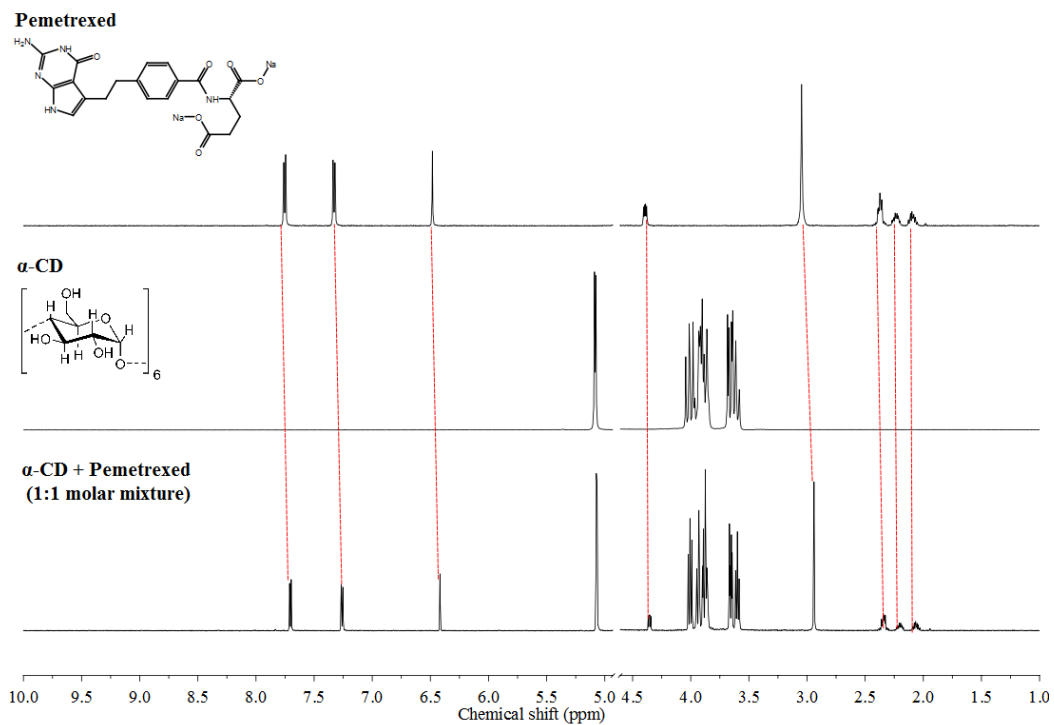

**Figure S6.**  $^1\text{H}$  NMR stacked spectra of PTX,  $\alpha$ -CD, and their 1:1 molar mixture (from top-to-bottom) in  $\text{D}_2\text{O}$  at 298 K.

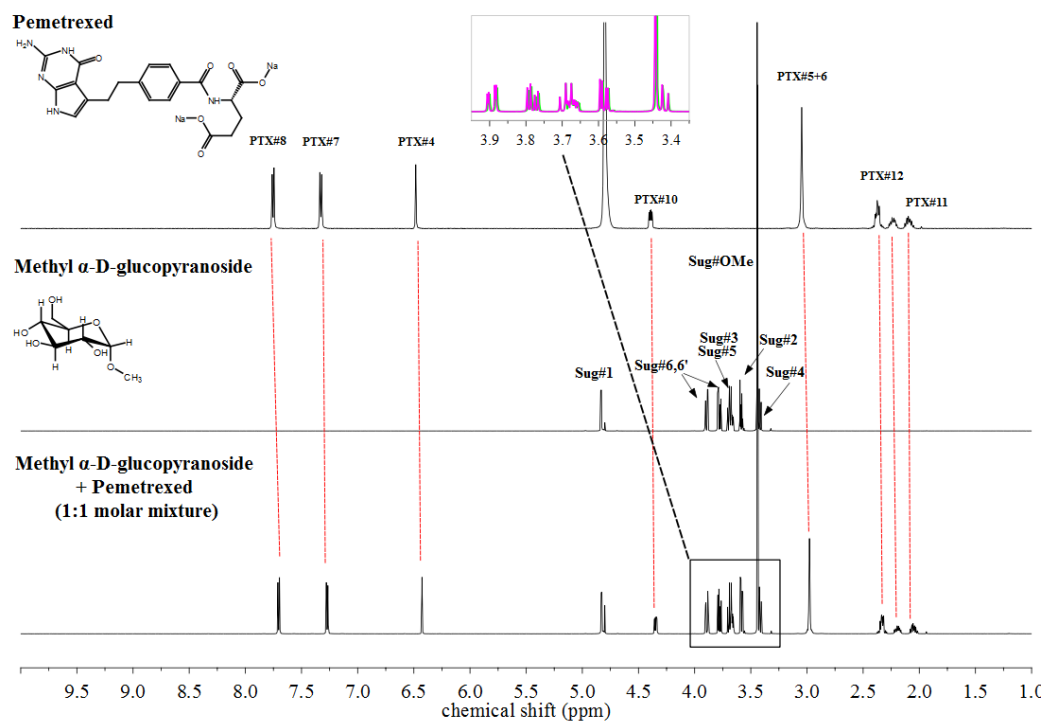

**Figure S7.**  $^1\text{H}$  NMR stacked spectra of PTX, methyl  $\alpha$ -D-glucopyranoside, and their 1:1 mixture (from top-to-bottom) in  $\text{D}_2\text{O}$  at 298 K; inset - enlargement of the spectrum exemplifying marginal chemical shift changes of the sugar' protons.

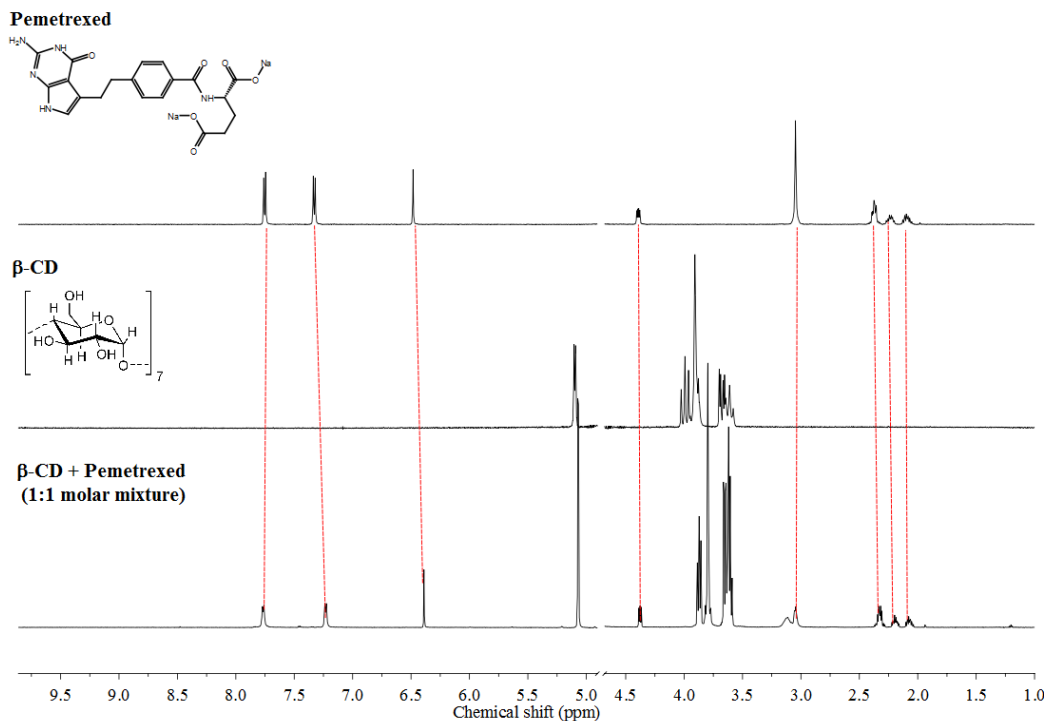

**Figure S8.**  $^1\text{H}$  NMR stacked spectra of PTX,  $\beta$ -CD, and their 1:1 molar mixture (from top-to-bottom) in  $\text{D}_2\text{O}$  at 298 K.

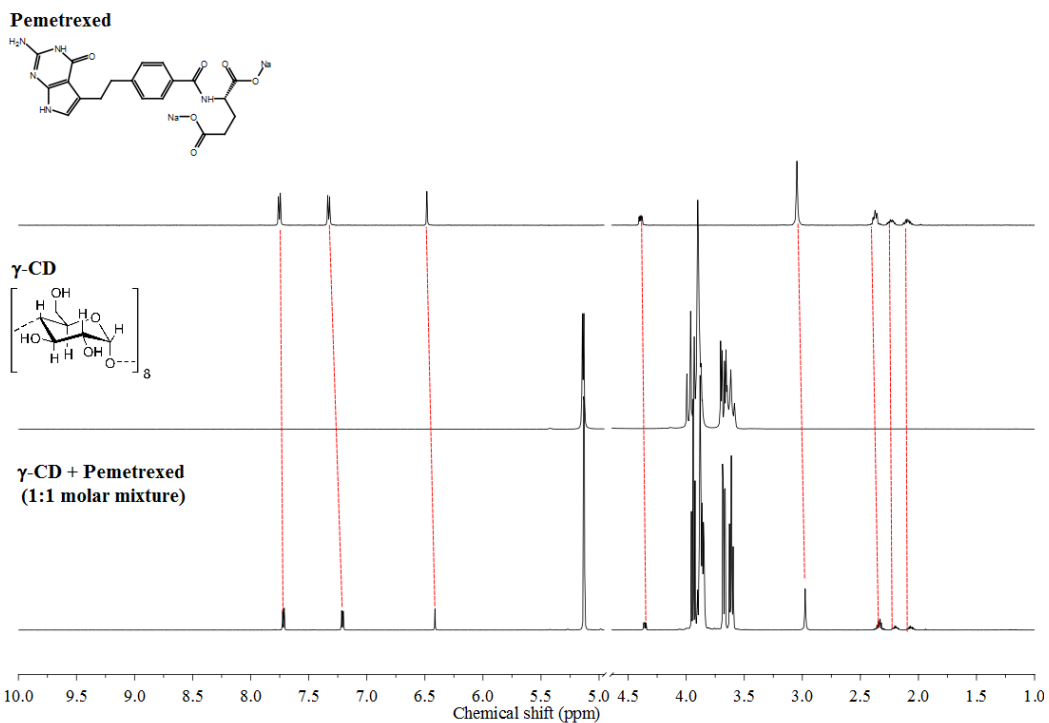

**Figure S9.**  $^1\text{H}$  NMR stacked spectra of PTX,  $\gamma$ -CD, and their 1:1 molar mixture (from top-to-bottom) in  $\text{D}_2\text{O}$  at 298 K.

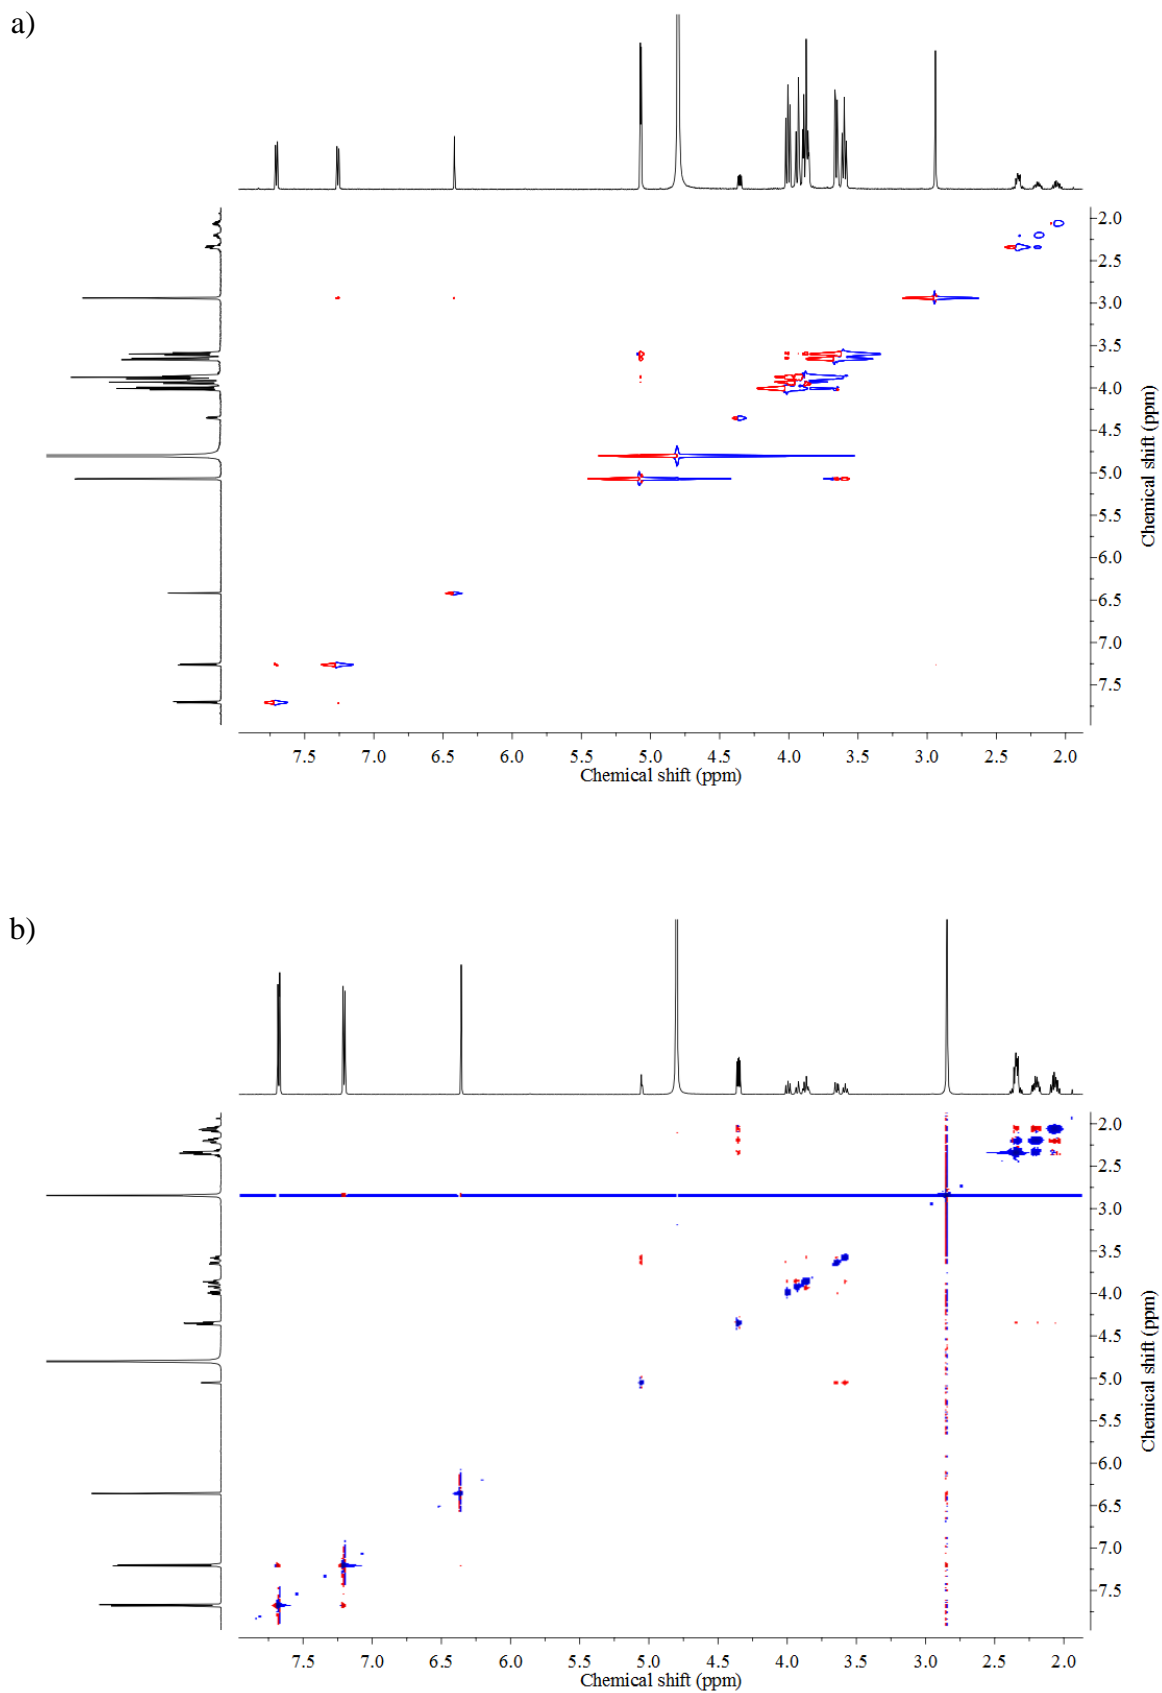

**Figure S10.** 2D ROESY NMR spectra of a 1:1 (a) and 1:16 (b) molar mixture of  $\alpha$ -CD and PTX in  $D_2O$  at 298 K.



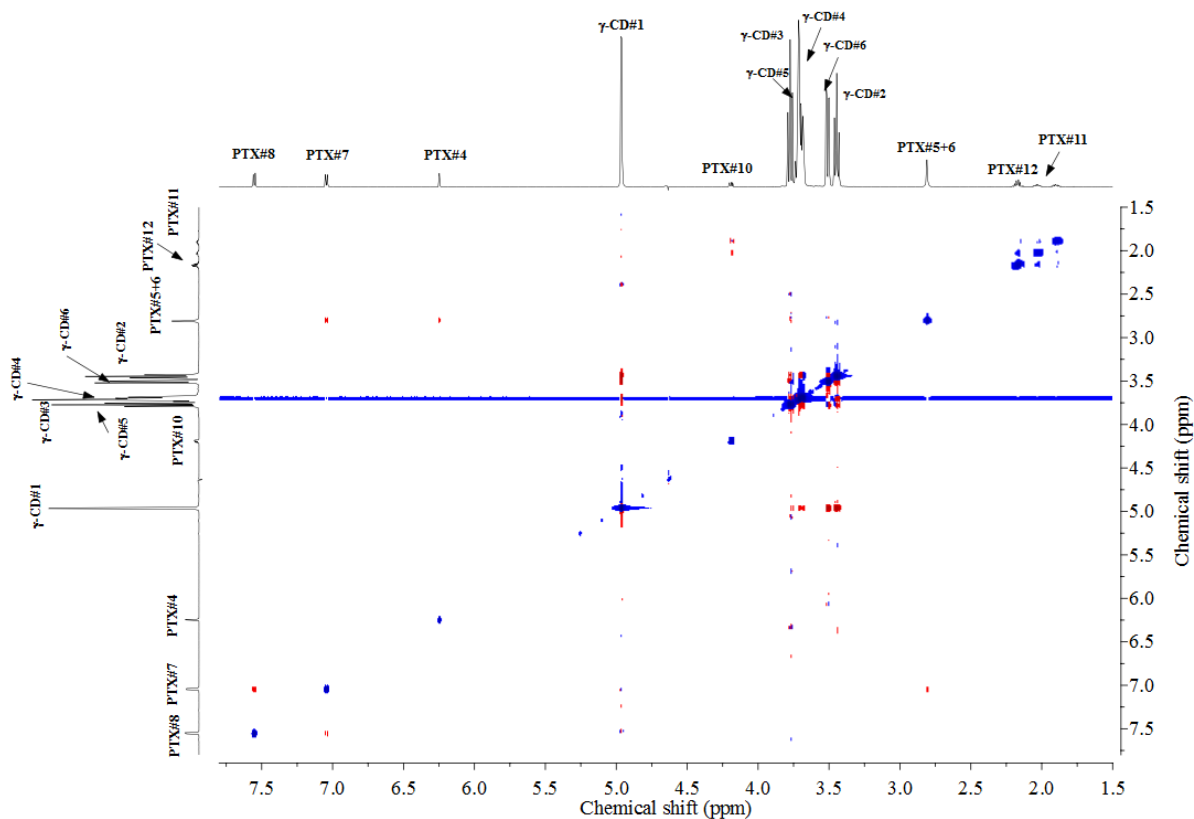

**Figure S11.** 2D ROESY NMR spectra of a 1:1 molar mixture of  $\gamma$ -CD and PTX in  $D_2O$  at 298 K.

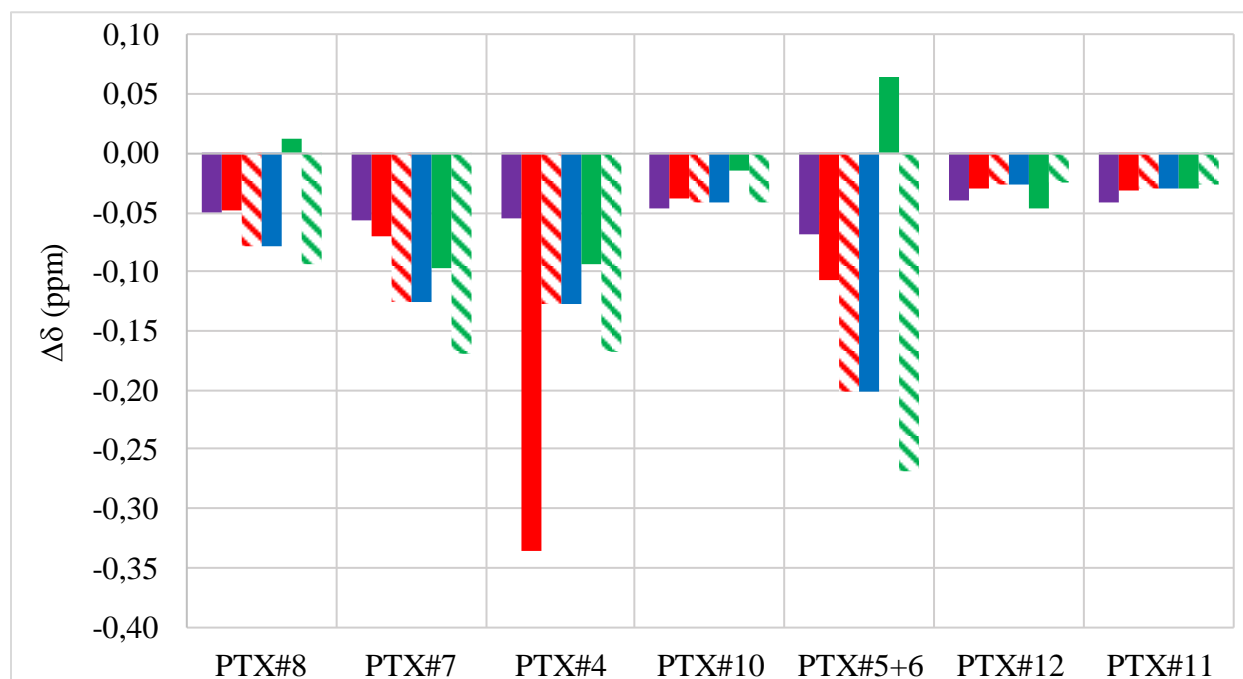

**Figure S12.** Experimental chemical shift changes ( $\Delta\delta$ ) of the PTX guest in the 1:1 (solid) and 1:16 (dashed) molar mixtures with an appropriate sugar in  $D_2O$  (methyl  $\alpha$ -D-glucopyranoside – violet,  $\alpha$ -CD/PTX – red,  $\beta$ -CD/PTX – blue,  $\gamma$ -CD/PTX – green).

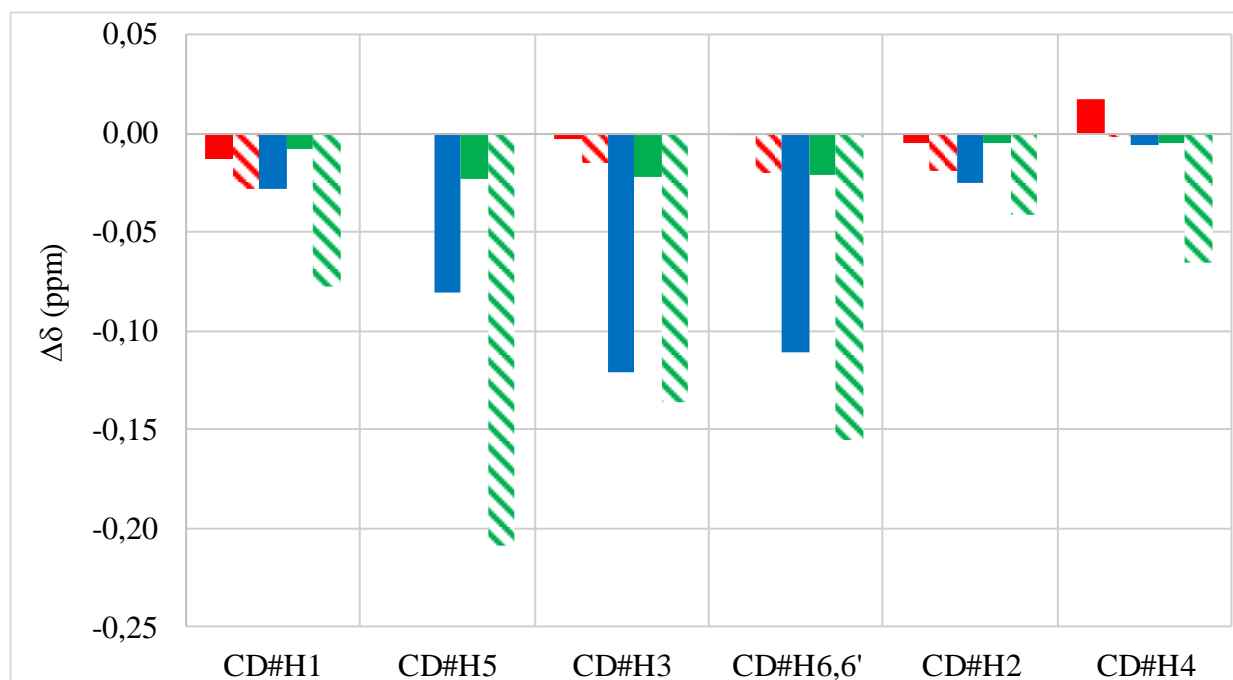

**Figure S13.** Experimental chemical shift changes ( $\Delta\delta$ ) of the CD host in the presence of equimolar (solid) and a 16-fold excess (dashed) of PTX guest in  $D_2O$  ( $\alpha$ -CD – red,  $\beta$ -CD – blue,  $\gamma$ -CD – green).

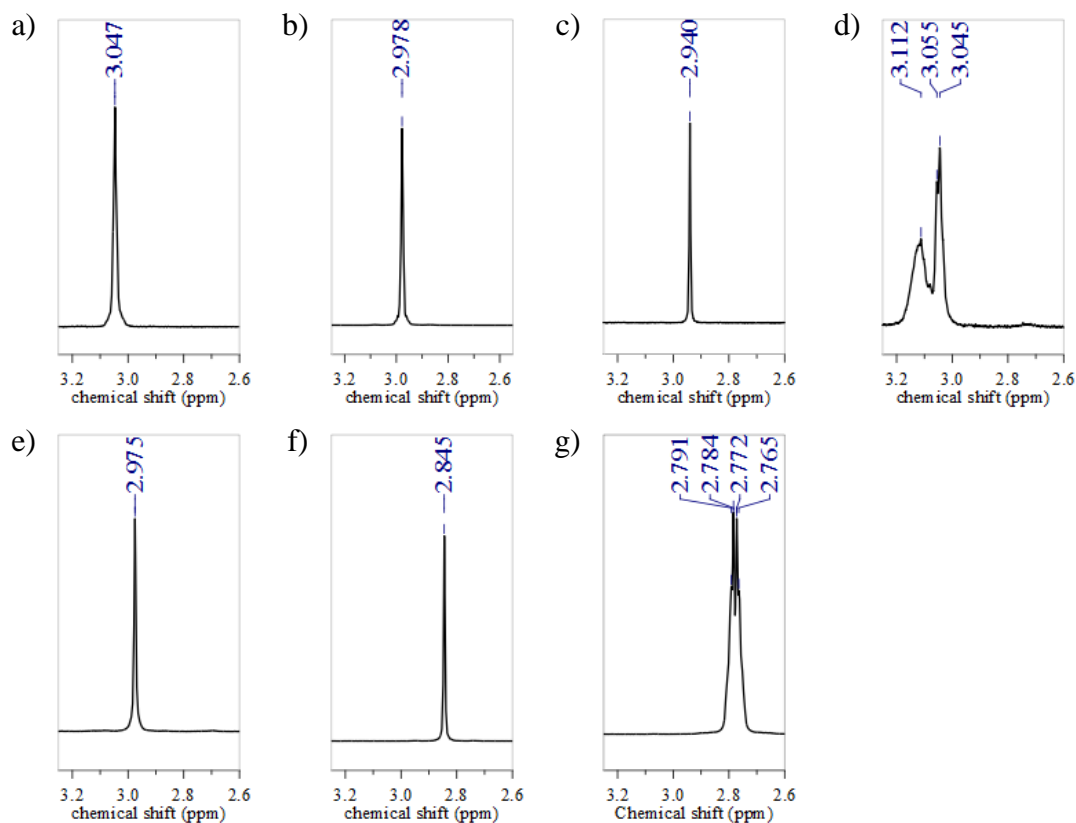

**Figure S14.** Partial  $^1H$  NMR spectra showing signals of the bridging ethylene moiety (PTX#H5+H6) of the PTX guest: (a) free PTX, equimolar mixtures with (b) methyl  $\alpha$ -D-glucopyranoside, (c)  $\alpha$ -CD, (d)  $\beta$ -CD, (e)  $\gamma$ -CD, and 1:16 molar mixtures (sugar/PTX) with (f)  $\alpha$ -CD and (g)  $\gamma$ -CD.

**Table S1.** Chemical shifts ( $\delta$ ) for protons of  $\alpha$ -CD, PTX, and their 1:1 mixture (in D<sub>2</sub>O) <sup>[a]</sup>

| Signal             | $\delta_{\text{free}}$ | $\delta_{\text{complex}}$ | $\Delta\delta_{\text{complex}}$ |
|--------------------|------------------------|---------------------------|---------------------------------|
| PTX#8              | 7.75                   | 7.70                      | -0.05                           |
| PTX#7              | 7.33                   | 7.26                      | -0.07                           |
| PTX#4              | 6.48                   | 6.15                      | -0.34                           |
| PTX#10             | 4.39                   | 4.35                      | -0.04                           |
| PTX#5+6            | 3.05                   | 2.94                      | -0.11                           |
| PTX#12             | 2.37                   | 2.34                      | -0.03                           |
| PTX#11             | 2.16                   | 2.13                      | -0.03                           |
| $\alpha$ -CD#H1    | 5.08                   | 5.07                      | -0.01                           |
| $\alpha$ -CD#H5    | 3.90                   | n.r.                      | n.r.                            |
| $\alpha$ -CD#H3    | 4.01                   | 4.01                      | 0.00                            |
| $\alpha$ -CD#H6,6' | 3.86                   | 3.86                      | 0.00                            |
| $\alpha$ -CD#H2    | 3.66                   | 3.66                      | -0.01                           |
| $\alpha$ -CD#H4    | 3.58                   | 3.60                      | 0.02                            |

[a] in D<sub>2</sub>O at 298 K;  $\delta_{\text{free}}$ ,  $\Delta\delta_{\text{complex}}$  (defined as  $\delta_{\text{complex}} - \delta_{\text{free}}$ ) are given in ppm; only protons for which important changes appear are presented; n.r. = not resolved due to overlapping with other signals.

**Table S2.** Chemical shifts for protons of methyl  $\alpha$ -D-glucopyranoside, PTX, and their 1:1 mixture (in D<sub>2</sub>O) <sup>[a]</sup>

| Signal    | $\delta_{\text{free}}$ | $\delta_{\text{complex}}$ | $\Delta\delta_{\text{complex}}$ |
|-----------|------------------------|---------------------------|---------------------------------|
| PTX#8     | 7.75                   | 7.70                      | -0.05                           |
| PTX#7     | 7.33                   | 7.27                      | -0.06                           |
| PTX#4     | 6.48                   | 6.43                      | -0.05                           |
| PTX#10    | 4.39                   | 4.35                      | -0.05                           |
| PTX#5+6   | 3.05                   | 2.98                      | -0.07                           |
| PTX#12    | 2.37                   | 2.33                      | -0.04                           |
| PTX#11    | 2.16                   | 2.12                      | -0.04                           |
| Sug#H1    | 4.83                   | 4.83                      | 0.00                            |
| Sug#H5    | 3.65                   | 3.66                      | 0.00                            |
| Sug#H3    | 3.69                   | 3.69                      | 0.00                            |
| Sug#H6,6' | 3.89, 3.78             | 3.89, 3.78                | 0.00, 0.00                      |
| Sug#H2    | 3.58                   | 3.58                      | 0.00                            |
| Sug#H4    | 3.42                   | 3.42                      | 0.00                            |
| Sug#OMe   | 3.44                   | 3.44                      | 0.00                            |

[a] in D<sub>2</sub>O at 298K;  $\delta_{\text{free}}$ ,  $\Delta\delta_{\text{complex}}$  (defined as  $\delta_{\text{complex}} - \delta_{\text{free}}$ ) are given in ppm; only protons for which important changes appear are presented.

**Table S3.** Chemical shifts ( $\delta$ ) for protons of  $\beta$ -CD, PTX, and their 1:1 mixture (in D<sub>2</sub>O) <sup>[a]</sup>

| Signal            | $\delta_{\text{free}}$ | $\delta_{\text{complex}}$ | $\Delta\delta_{\text{complex}}$ |
|-------------------|------------------------|---------------------------|---------------------------------|
| PTX#8             | 7.75                   | 7.77                      | 0.01                            |
| PTX#7             | 7.33                   | 7.23                      | -0.10                           |
| PTX#4             | 6.48                   | 6.39                      | -0.09                           |
| PTX#10            | 4.39                   | 4.38                      | -0.01                           |
| PTX#5+6           | 3.05                   | 3.11                      | 0.06                            |
| PTX#12            | 2.37                   | 2.33                      | -0.05                           |
| PTX#11            | 2.16                   | 2.13                      | -0.03                           |
| $\beta$ -CD#H1    | 5.10                   | 5.07                      | -0.03                           |
| $\beta$ -CD#H5    | 3.88                   | 3.80                      | -0.08                           |
| $\beta$ -CD#H3    | 3.99                   | 3.87                      | -0.12                           |
| $\beta$ -CD#H6,6' | 3.91                   | 3.80                      | -0.11                           |
| $\beta$ -CD#H2    | 3.68                   | 3.65                      | -0.02                           |
| $\beta$ -CD#H4    | 3.61                   | 3.61                      | -0.01                           |

[a] in D<sub>2</sub>O at 298K;  $\delta_{\text{free}}$ ,  $\Delta\delta_{\text{complex}}$  (defined as  $\delta_{\text{complex}} - \delta_{\text{free}}$ ) are given in ppm; only protons for which important changes appear are presented.

**Table S4.** Chemical shifts ( $\delta$ ) for protons of  $\gamma$ -CD, PTX, and their 1:1 mixture (in D<sub>2</sub>O) <sup>[a]</sup>

| Signal             | $\delta_{\text{free}}$ | $\delta_{\text{complex}}$ | $\Delta\delta_{\text{complex}}$ |
|--------------------|------------------------|---------------------------|---------------------------------|
| PTX#8              | 7.75                   | 7.72                      | -0.04                           |
| PTX#7              | 7.33                   | 7.21                      | -0.12                           |
| PTX#4              | 6.48                   | 6.41                      | -0.07                           |
| PTX#10             | 4.39                   | 4.36                      | -0.04                           |
| PTX#5+6            | 3.05                   | 2.98                      | -0.07                           |
| PTX#12             | 2.37                   | 2.34                      | -0.03                           |
| PTX#11             | 2.16                   | 2.13                      | -0.03                           |
| $\gamma$ -CD#H1    | 5.14                   | 5.13                      | -0.01                           |
| $\gamma$ -CD#H5    | 3.87                   | 3.85                      | -0.02                           |
| $\gamma$ -CD#H3    | 3.96                   | 3.94                      | -0.02                           |
| $\gamma$ -CD#H6,6' | 3.90                   | 3.88                      | -0.02                           |
| $\gamma$ -CD#H2    | 3.68                   | 3.68                      | 0.00                            |
| $\gamma$ -CD#H4    | 3.62                   | 3.61                      | 0.00                            |

[a] in D<sub>2</sub>O at 298K;  $\delta_{\text{free}}$ ,  $\Delta\delta_{\text{complex}}$  (defined as  $\delta_{\text{complex}} - \delta_{\text{free}}$ ) are given in ppm; only protons for which important changes appear are presented.

#### 4. $^1\text{H}$ spectra in $\text{DMSO-}d_6$

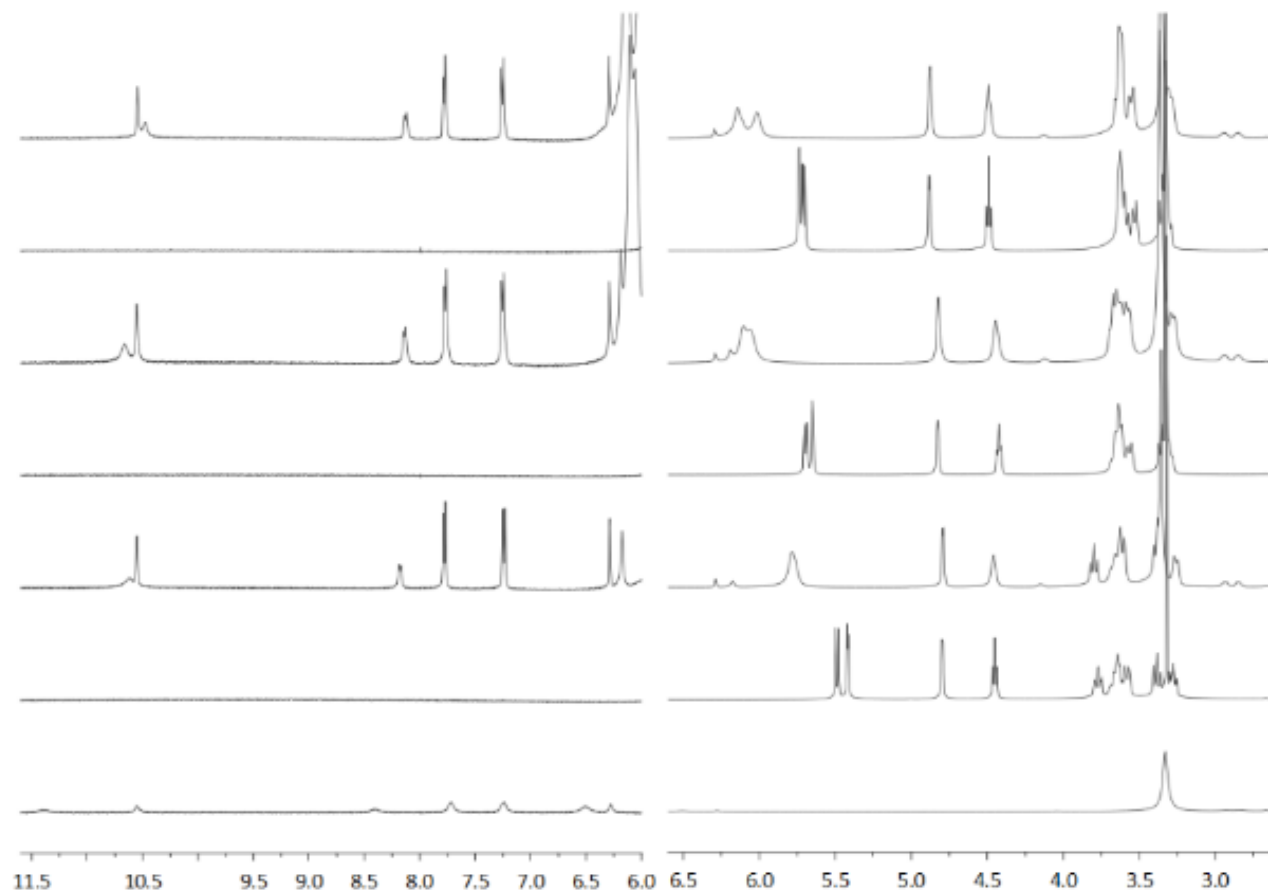

**Figure S15.** Stacked spectra of the free PTX, CDs, and complexes of CDs with PTX in  $\text{DMSO-}d_6$  (from bottom to top: PTX,  $\alpha$ -CD,  $\alpha$ -CD+PTX,  $\beta$ -CD,  $\beta$ -CD+PTX,  $\gamma$ -CD,  $\gamma$ -CD+PTX). Notice that broad signals belonging to the PTX molecule became sharp after addition of CDs. This clearly indicates complex formation which increases solubility of PTX salt in that particular solvent.

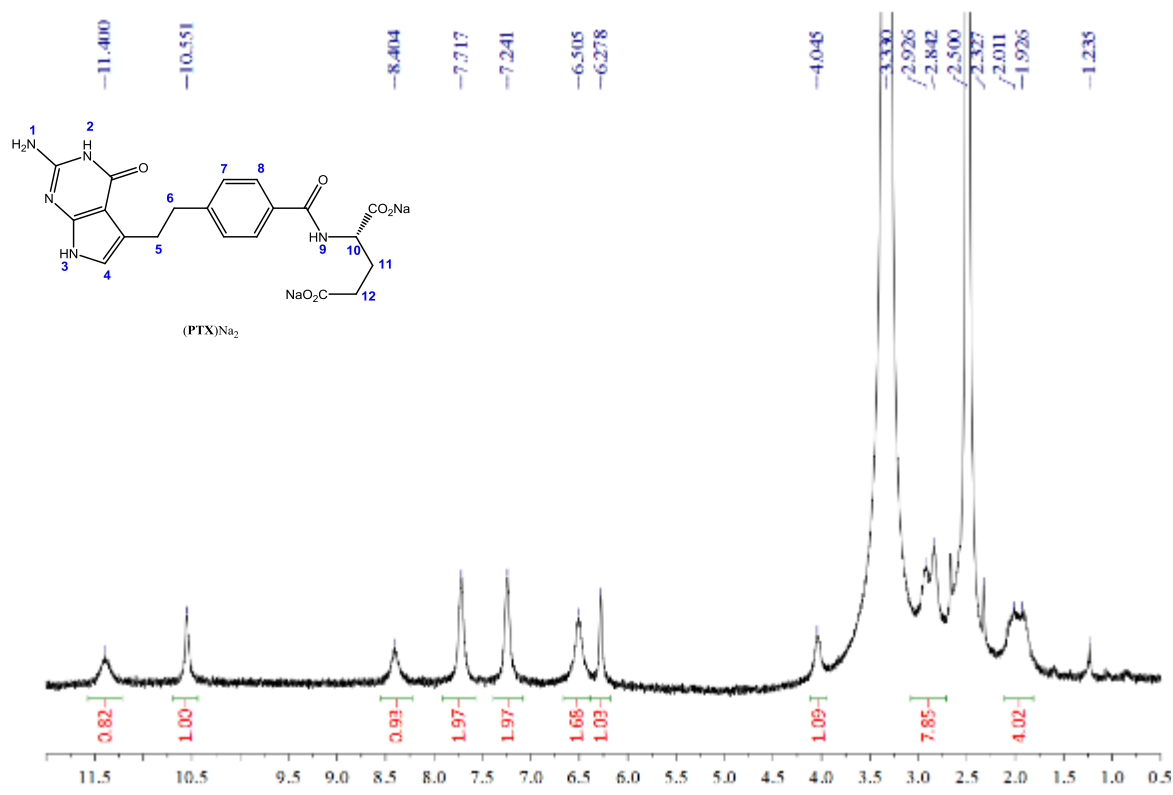

**Figure S16.** <sup>1</sup>H NMR (400 MHz) spectrum of disodium salt of PTX in DMSO-*d*<sub>6</sub>.

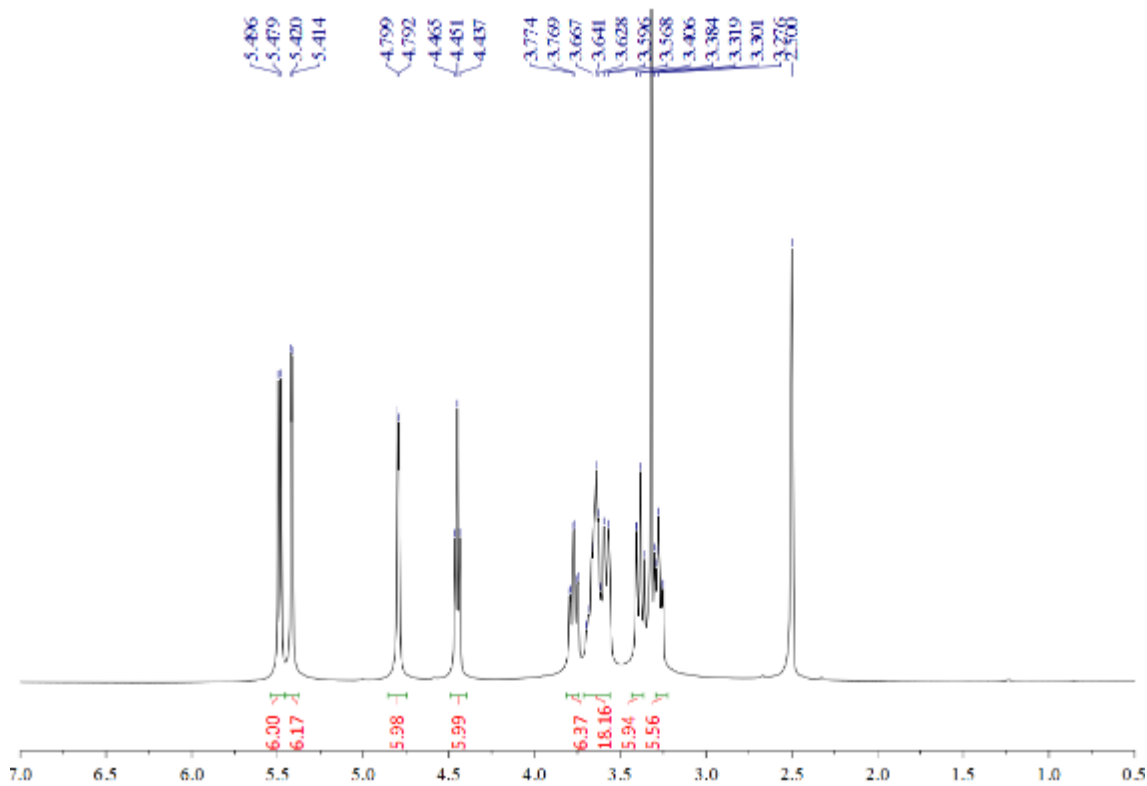

**Figure S17.** <sup>1</sup>H NMR (400 MHz) spectrum of free α-CD in DMSO-*d*<sub>6</sub>.

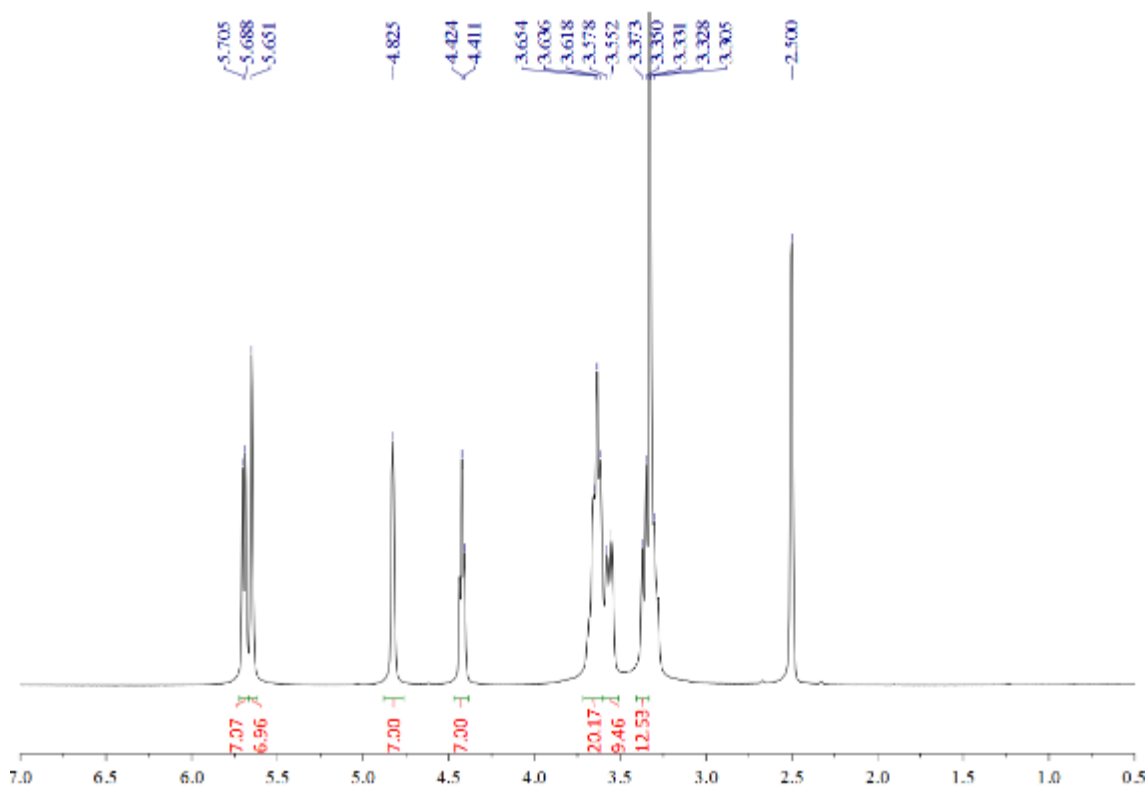

**Figure S18.**  $^1\text{H}$  NMR (400 MHz) spectrum of free  $\beta$ -CD in  $\text{DMSO-}d_6$ .

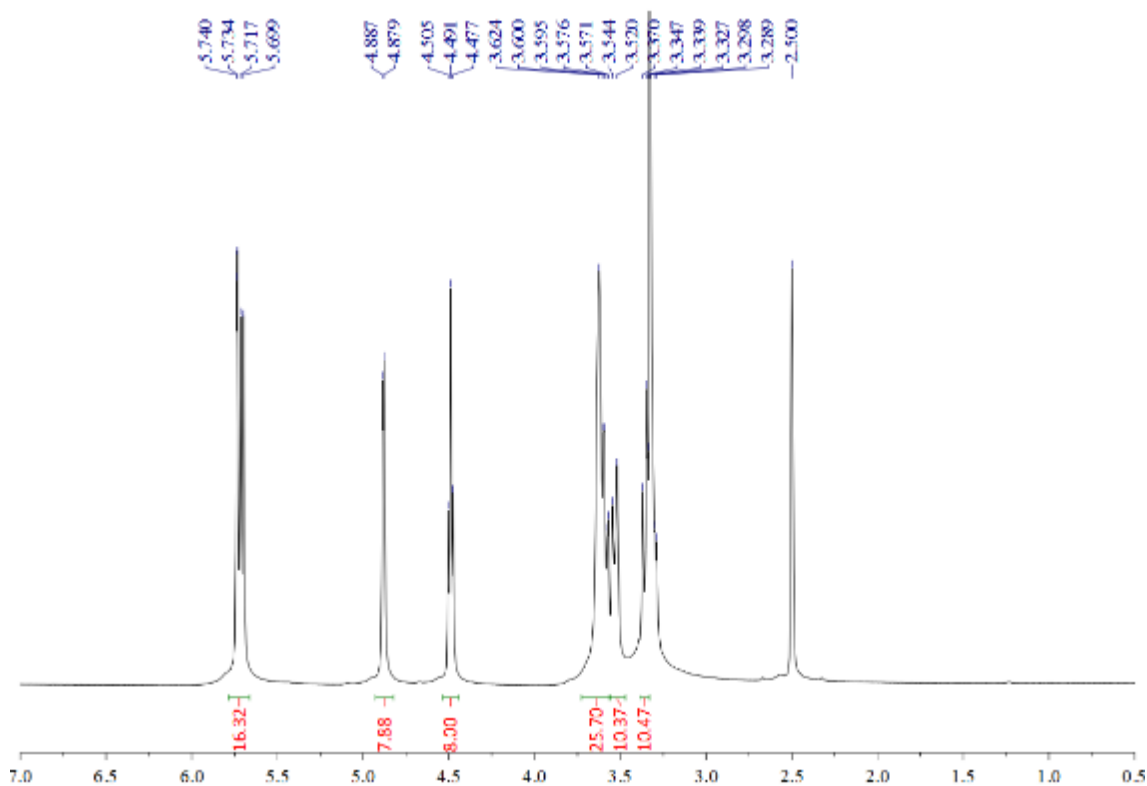

**Figure S19.**  $^1\text{H}$  NMR (400 MHz) spectrum of free  $\gamma$ -CD in  $\text{DMSO-}d_6$ .

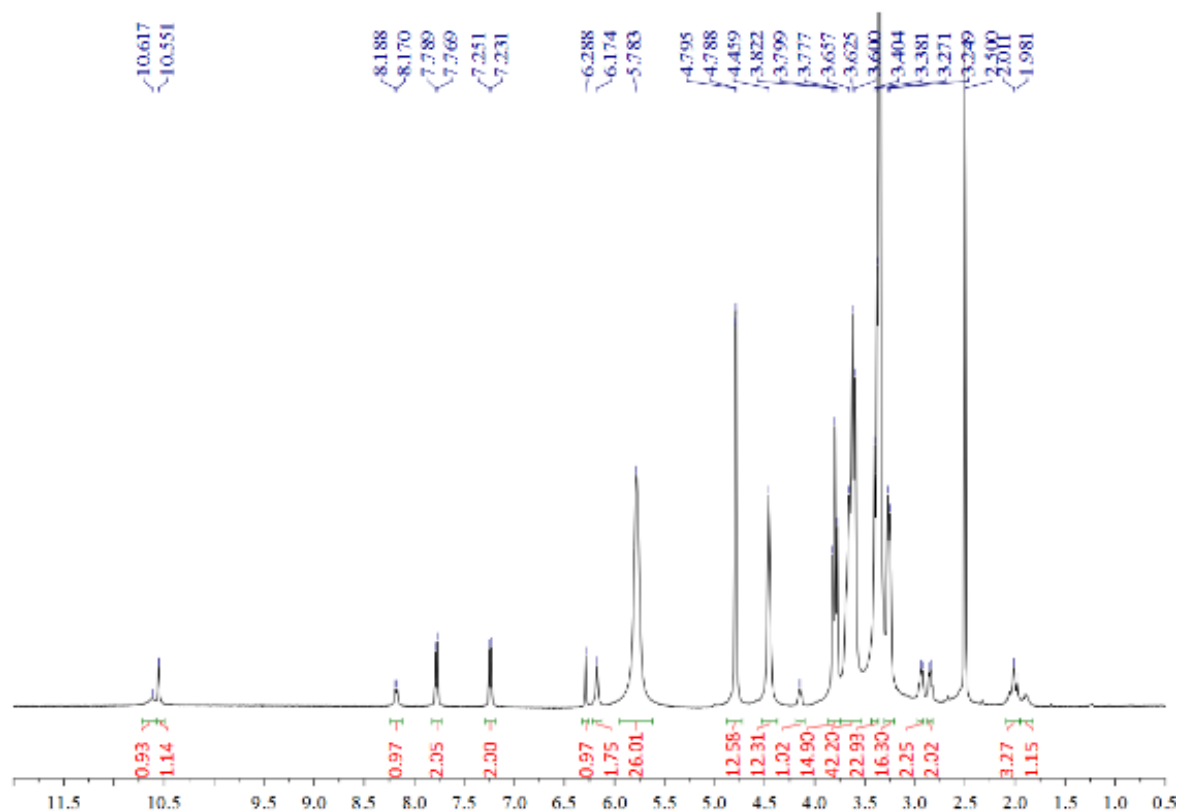

**Figure S20.**  $^1\text{H}$  NMR (400 MHz) spectrum of a mixture of  $\alpha$ -CD and PTX (1:1 molar ratio) in  $\text{DMSO-}d_6$ .

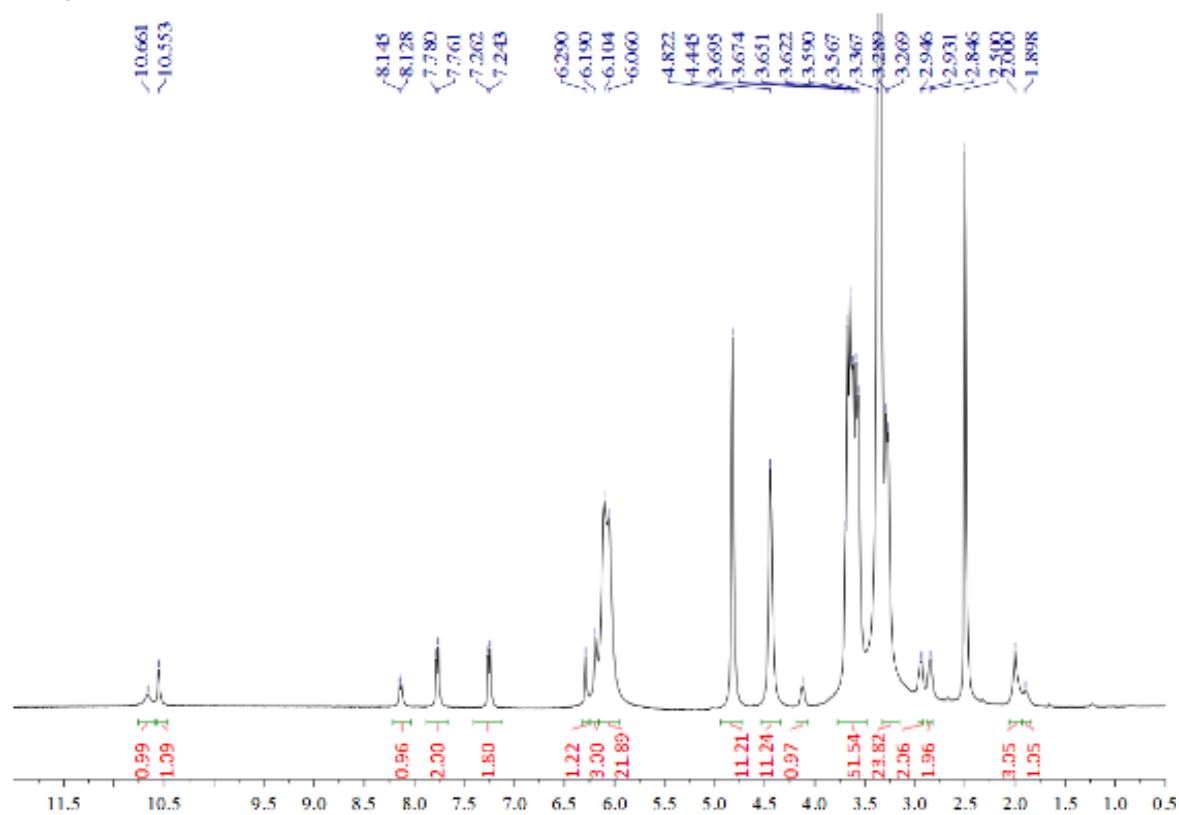

**Figure S21.**  $^1\text{H}$  NMR (400 MHz) spectrum of a mixture of  $\beta$ -CD and PTX (1:1 molar ratio) in  $\text{DMSO-}d_6$ .



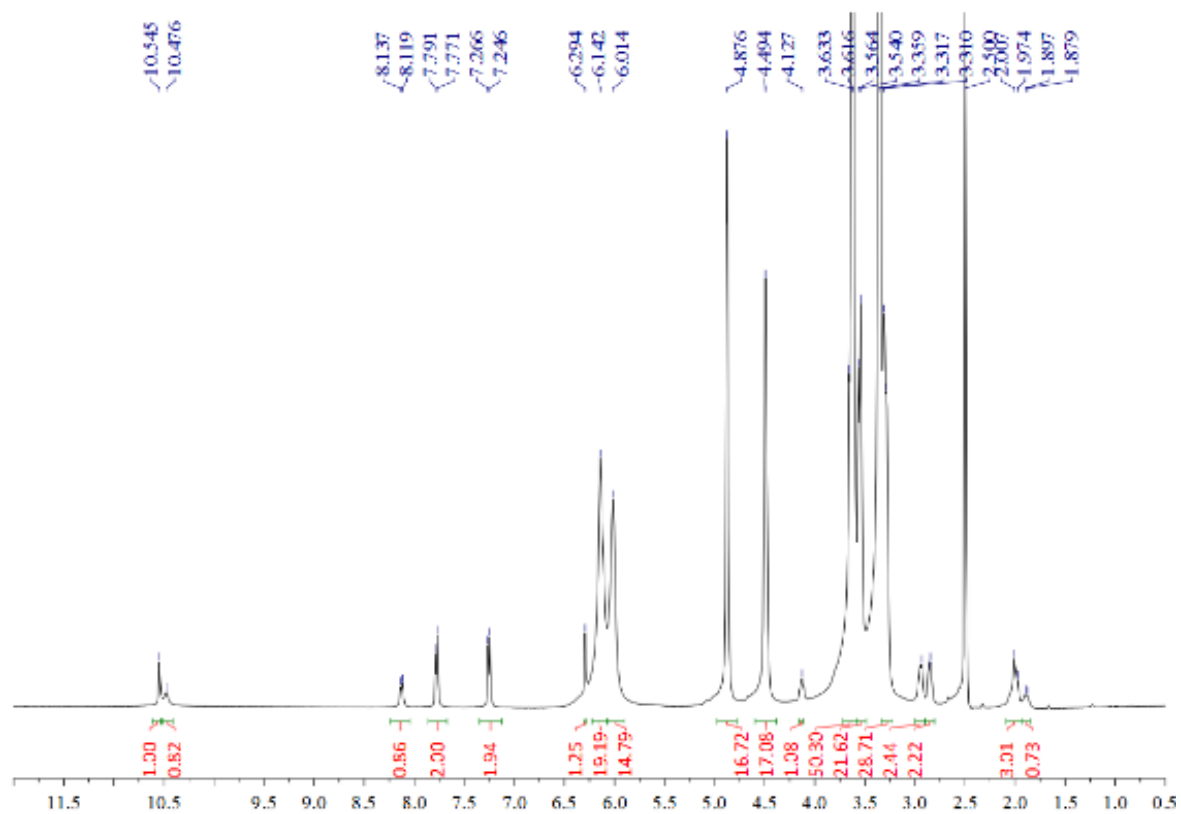

**Figure S22.** <sup>1</sup>H NMR (400 MHz) spectrum of a mixture of  $\gamma$ -CD and PTX (1:1 molar ratio) in DMSO-*d*<sub>6</sub>.

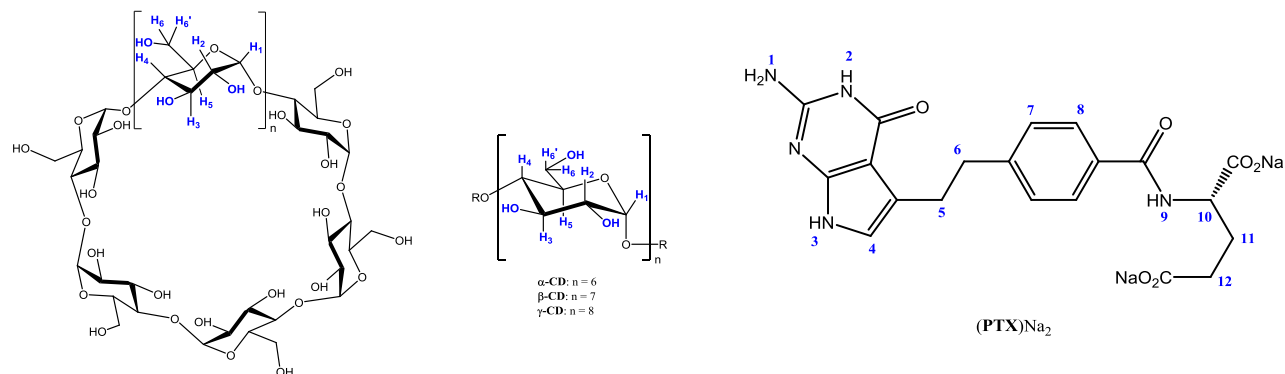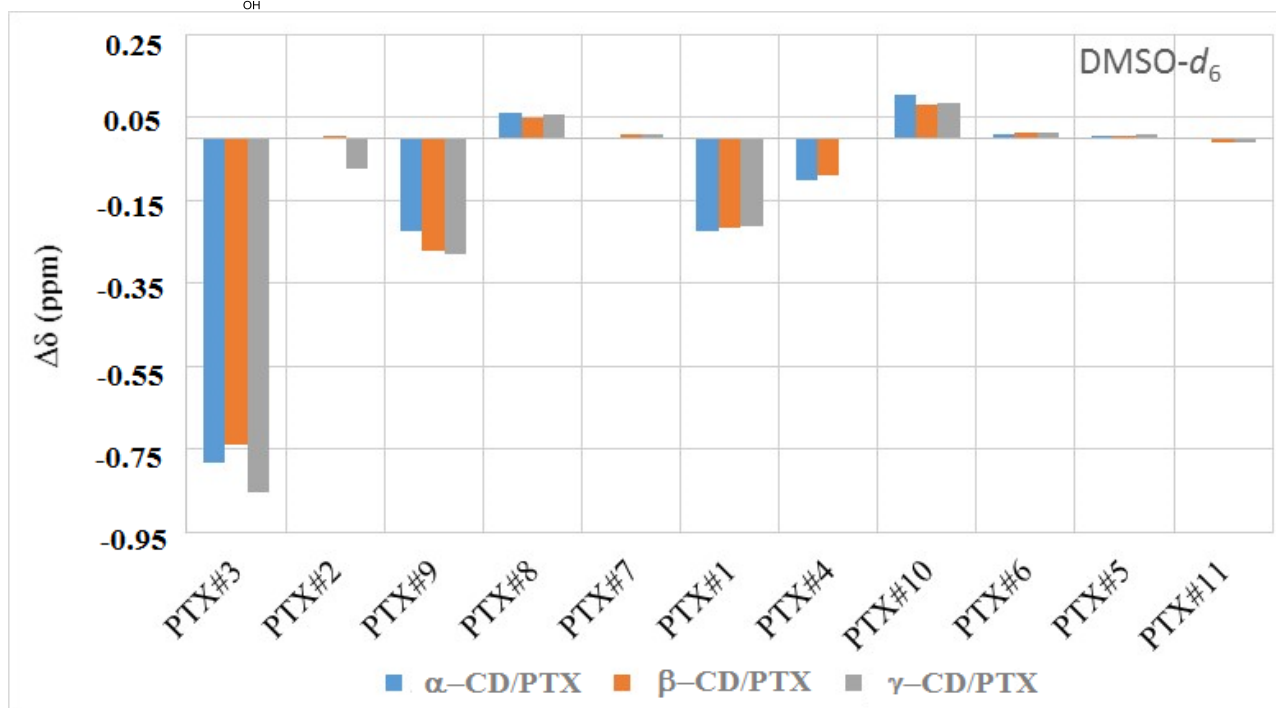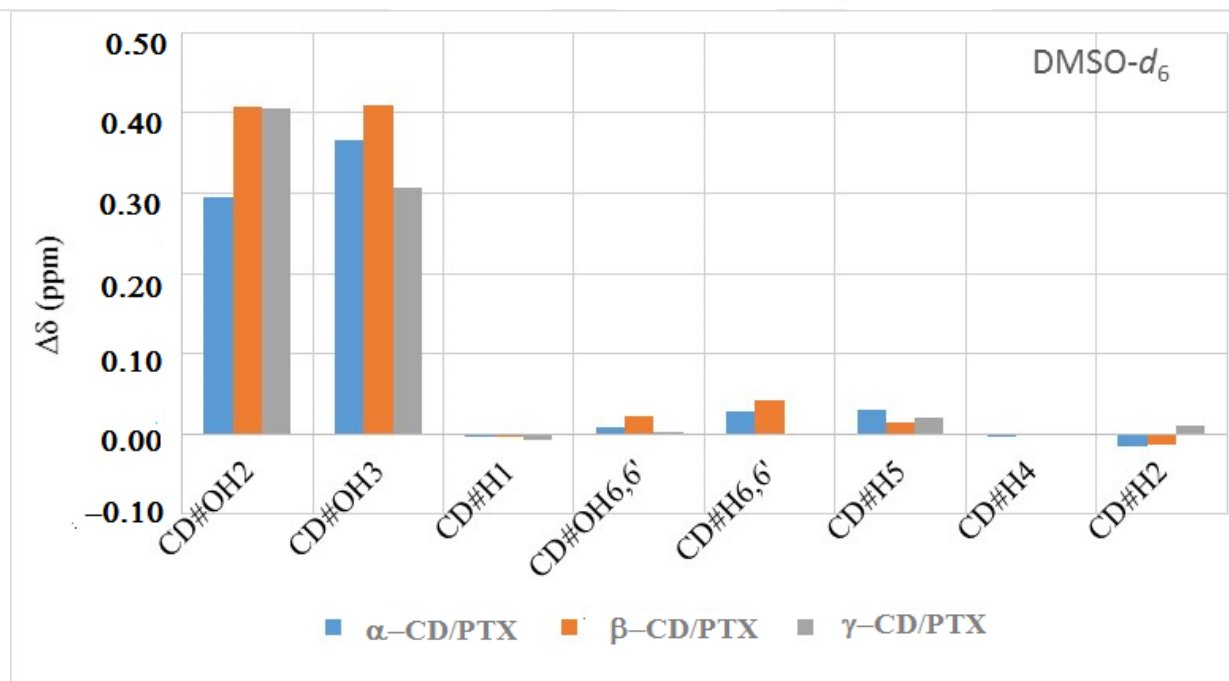

**Figure S23.** Experimental changes in chemical shifts of PTX (top) and CD (bottom) upon 1:1 host:guest complex formation in DMSO-*d*<sub>6</sub>.

**Table S5.** Changes in chemical shifts of PTX (added as disodium salt) upon 1:1 complex formation with CD in DMSO- $d_6$ <sup>[a]</sup>

| Signal | PTX <sub>free</sub> | $\alpha$ -CD/PTX |                | $\beta$ -CD/PTX |                | $\gamma$ -CD/PTX |                  |
|--------|---------------------|------------------|----------------|-----------------|----------------|------------------|------------------|
|        | $\delta_F$          | $\delta_C$       | $\Delta\delta$ | $\delta_C$      | $\Delta\delta$ | $\delta_C$       | $\Delta\delta$   |
| PTX#3  | 11.400              | 10.617           | -0.783         | 10.661          | -0.739         | 10.545           | -0.855           |
| PTX#2  | 10.551              | 10.551           | 0.000          | 10.553          | 0.002          | 10.476           | -0.075           |
| PTX#9  | 8.404               | 8.179            | -0.225         | 8.134           | -0.270         | 8.125            | -0.279           |
| PTX#8  | 7.717               | 7.777            | 0.060          | 7.766           | 0.049          | 7.775            | 0.058            |
| PTX#7  | 7.241               | 7.240            | -0.001         | 7.250           | 0.009          | 7.252            | 0.011            |
| PTX#1  | 6.505               | 6.280            | -0.225         | 6.290           | -0.215         | 6.291            | -0.214           |
| PTX#4  | 6.278               | 6.175            | -0.103         | 6.190           | -0.088         | — <sup>[b]</sup> | — <sup>[b]</sup> |
| PTX#10 | 4.045               | 4.150            | 0.105          | 4.124           | 0.079          | 4.128            | 0.083            |
| PTX#6  | 2.926               | 2.936            | 0.010          | 2.939           | 0.013          | 2.941            | 0.015            |
| PTX#5  | 2.842               | 2.849            | 0.007          | 2.848           | 0.006          | 2.851            | 0.009            |
| PTX#11 | 2.011               | 2.011            | 0.000          | 2.000           | -0.011         | 2.002            | -0.009           |

[a]  $\delta_F$ ,  $\delta_C$ , and  $\Delta\delta$  are given in ppm;  $\delta_F$  and  $\delta_C$  indicate chemical shift of the uncomplexed and complexed form, respectively;  $\Delta\delta = \delta_C - \delta_F$ ; [b] signal not visible.

**Table S6.** Changes in chemical shifts of CD upon 1:1 complex formation with PTX in DMSO- $d_6$ <sup>[a]</sup>

| Signal    | $\alpha$ -CD <sub>free</sub> | $\alpha$ -CD/PTX |                | $\beta$ -CD <sub>free</sub> | $\beta$ -CD/PTX  |                  | $\gamma$ -CD <sub>free</sub> | $\gamma$ -CD/PTX |                  |
|-----------|------------------------------|------------------|----------------|-----------------------------|------------------|------------------|------------------------------|------------------|------------------|
|           | $\delta_F$                   | $\delta_C$       | $\Delta\delta$ | $\delta_F$                  | $\delta_C$       | $\Delta\delta$   | $\delta_F$                   | $\delta_C$       | $\Delta\delta$   |
| CD#OH2    | 5.488                        | 5.783            | 0.296          | 5.696                       | 6.104            | 0.408            | 5.737                        | 6.142            | 0.405            |
| CD#OH3    | 5.417                        | 5.783            | 0.366          | 5.651                       | 6.060            | 0.409            | 5.708                        | 6.014            | 0.306            |
| CD#H1     | 4.796                        | 4.792            | -0.004         | 4.827                       | 4.823            | -0.004           | 4.883                        | 4.876            | -0.007           |
| CD#OH6,6' | 4.451                        | 4.459            | 0.008          | 4.423                       | 4.445            | 0.022            | 4.491                        | 4.494            | 0.003            |
| CD#H6,6'  | 3.772                        | 3.799            | 0.027          | 3.633                       | 3.674            | 0.041            | 3.624                        | 3.624            | 0.000            |
| CD#H5     | 3.582                        | 3.613            | 0.031          | 3.565                       | 3.579            | 0.014            | 3.532                        | 3.552            | 0.020            |
| CD#H4     | 3.384                        | 3.381            | -0.003         | 3.350                       | — <sup>[b]</sup> | — <sup>[b]</sup> | 3.347                        | — <sup>[b]</sup> | — <sup>[b]</sup> |
| CD#H2     | 3.276                        | 3.260            | -0.016         | 3.293                       | 3.279            | -0.014           | 3.289                        | 3.299            | 0.009            |

[a]  $\delta_F$ ,  $\delta_C$ , and  $\Delta\delta$  are given in ppm;  $\delta_F$  and  $\delta_C$  indicate chemical shift of the uncomplexed and complexed form, respectively;  $\Delta\delta = \delta_C - \delta_F$ ; [b] signal not visible.

## 5. FTIR-ATR and Raman

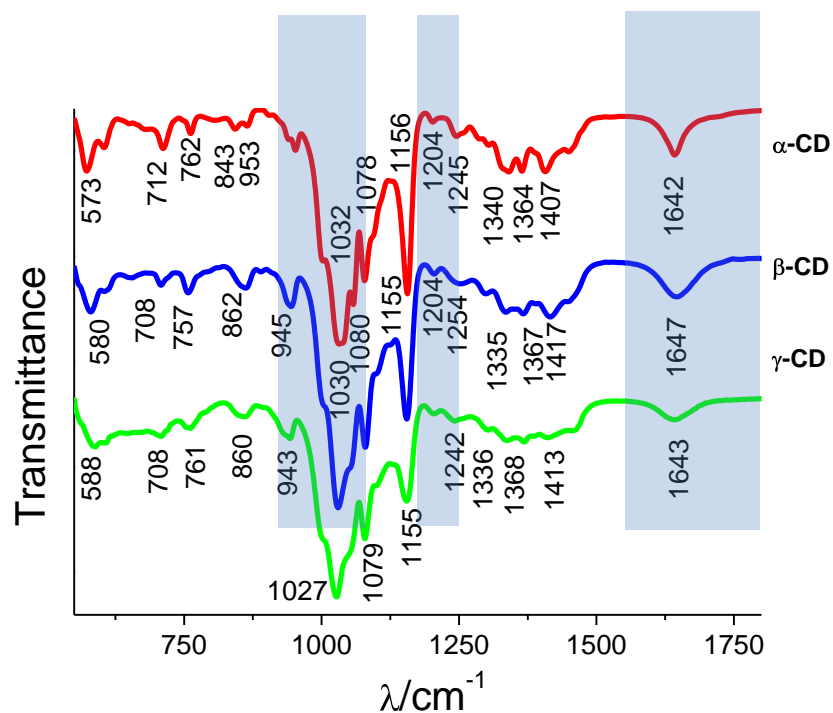

**Figure S24.** The FTIR spectra of native CDs.

**Table S7.** FTIR band position assignments for native cyclodextrins.

| FTIR band positions [ $\text{cm}^{-1}$ ] |             |              | Assignments                                                                                  |
|------------------------------------------|-------------|--------------|----------------------------------------------------------------------------------------------|
| $\alpha$ -CD                             | $\beta$ -CD | $\gamma$ -CD |                                                                                              |
| 762                                      | 758         | 761          | $(\text{COO})^-$                                                                             |
| 843                                      | 862         | 860          | Skeletal "C-C" stretching, CH out of plane bending (aromatic and skeletal)                   |
| 953                                      | 945         | 943          | "C=O" stretching, in plane bending of CCH                                                    |
| 1032                                     | 1030        | 1027         | C-O in C-O-C stretching                                                                      |
| 1078                                     | 1080        | 1079         | "C-O", "C-C" stretching, in plane bending of OCH                                             |
| 1156                                     |             | 1155         | In plane bending CCH (aromatic and skeletal),<br>"C-O" symmetric stretching                  |
| 1340                                     | 1335        | 1336         | "C-O-C" stretching, out of plane bending of $\text{CH}_3$ , in plane bending of aromatic CCH |
| 1407                                     | 1417        | 1413         | OCH, CCH                                                                                     |
| 1450                                     |             | 1457         | In plane bending of $\text{CH}_3$                                                            |
| 1642                                     | 1647        | 1643         | Bending vibration of the "O-H", "C=C" stretching                                             |

**Table S8.** FTIR band position assignments for PTX and its complexes with  $\alpha$ -,  $\beta$ -, and  $\gamma$ -CDs.

| FTIR band positions [ $\text{cm}^{-1}$ ] |                   |                  |                   |                                                                                                |
|------------------------------------------|-------------------|------------------|-------------------|------------------------------------------------------------------------------------------------|
| PTX                                      | $\alpha$ -CD /PTX | $\beta$ -CD/ PTX | $\gamma$ -CD/ PTX | Assignments                                                                                    |
| 676                                      |                   |                  |                   | (COO) <sup>-</sup>                                                                             |
| 784                                      |                   | 757, 786         | 759               | Skeletal “C–C” stretching, CH out of plane bending (aromatic and skeletal)                     |
| 812                                      |                   |                  |                   |                                                                                                |
| 833                                      | 869               | 862              | 860               | CH <sub>3</sub> and CH out of plane bending of aromatic CCH and skeletal CCH                   |
| 853                                      |                   |                  |                   |                                                                                                |
| 906                                      |                   |                  |                   | “C=O” stretching, in plane bending of CCH                                                      |
| 952                                      | 952               | 945              | 943               | “C–O–C” stretching, out of plane bending of CH <sub>3</sub> , in plane bending of aromatic CCH |
|                                          | 1028              | 1030             | 1027              | “C–O”, “C–C” stretching, in plane bending of OCH                                               |
| 1083, 1096                               | 1077              | 1080             | 1079              | CH overtone stretching, “C–C” stretching                                                       |
| 1155                                     | 1152              | 1155             | 1155              | CH in plane bending of “C=CH”, aromatic “C–O” stretching                                       |
| 1272 1287                                |                   |                  |                   | In plane bending of CH, enolic COH, skeletal CCC                                               |
| 1320, 1355, 1375                         |                   |                  |                   |                                                                                                |
| 1404                                     | 1414              | 1417             | 1413              | OCH, CCH                                                                                       |
| 1445, 1507, 1531                         | 1502              | 1500             | 1496              | “C=C” stretching, in plane bending of CH <sub>3</sub> , “C=O” stretching,                      |
| 1569, 1603                               | 1609              | 1602             | 1528              | “C–C=O” in plane bending,                                                                      |
| 1623, 1671                               | 1638              | 1647             | 1632, 1663        | “C=O”, ring “C=C” stretching                                                                   |

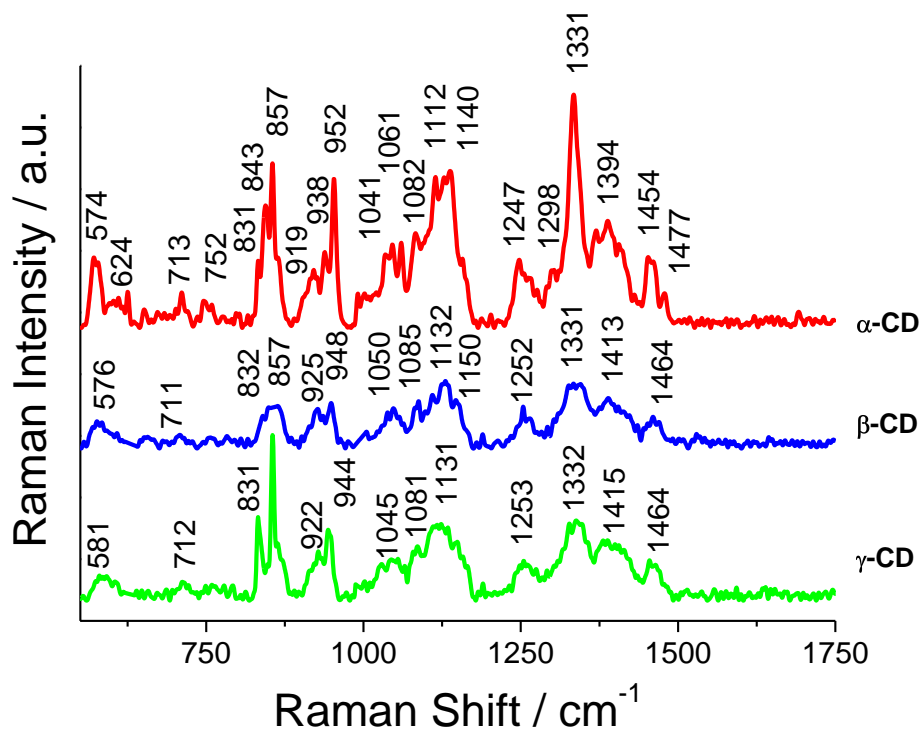

**Figure S25.** The Raman spectra of native CDs.

**Table S9.** Raman band position assignments for native cyclodextrins.

| Raman band positions [ $\text{cm}^{-1}$ ] |             |              | Assignments                                                                        |
|-------------------------------------------|-------------|--------------|------------------------------------------------------------------------------------|
| $\alpha$ -CD                              | $\beta$ -CD | $\gamma$ -CD |                                                                                    |
| 713, 752                                  | 711, 755    |              | ( $\text{COO}^-$ )                                                                 |
| 831, 843, 857                             | 832, 857    | 831, 855     | ( $\text{COO}^-$ ), ( $\text{CH}_3$ )                                              |
| 919, 938, 952                             | 925, 948    | 922, 944     | Stretching (CC)                                                                    |
| 1041                                      | 1050        |              | Stretching (CN)                                                                    |
| 1061, 1082                                | 1085        | 1081         | Stretching (CN)                                                                    |
| 1331                                      | 1325, 1331  | 1332         | Wagging of $\text{CH}_2$ , $\text{CH}$ , $\text{OH}$                               |
| 1454, 1477                                | 1413, 1464  | 1415, 1464   | In plane bending of $\text{CH}_3$ , $\text{OH}$ and $\text{C}=\text{C}$ stretching |

**Table S10.** Raman band position assignments for PTX and its complexes with  $\alpha$ -,  $\beta$ -, and  $\gamma$ -CDs.

| PTX              | Raman band positions [ $\text{cm}^{-1}$ ] |             |              | Assignments                                                                                                           |
|------------------|-------------------------------------------|-------------|--------------|-----------------------------------------------------------------------------------------------------------------------|
|                  | $\alpha$ -CD                              | $\beta$ -CD | $\gamma$ -CD |                                                                                                                       |
| 810              | 810                                       | 769         |              | (COO <sup>-</sup> )                                                                                                   |
| 834, 857         | 834, 857                                  | 834, 857    | 831, 855     | (COO <sup>-</sup> ), CH <sub>3</sub>                                                                                  |
| 878              | 887                                       |             |              | CH <sub>3</sub>                                                                                                       |
| 908              | 923                                       | 931, 950    |              | Stretching (CC)                                                                                                       |
| 992              | 992                                       | 992         | 990          | Rocking (NH <sub>2</sub> ) out of plane, ring deformation <sup>(a)</sup>                                              |
| 1038             |                                           |             |              | Stretching (CN), Rocking (OH)(CH)(NH <sub>2</sub> ) <sup>(a)</sup>                                                    |
| 1091             | 1078                                      | 1087        | 1080         | Stretching (CN), Rocking (OH) <sup>(a)</sup>                                                                          |
| 1159             |                                           |             | 1150         | C=C-H and =C-C=, Rocking (CH)(OH), wagging (NH <sub>2</sub> ) <sup>(a)</sup>                                          |
| 1195             |                                           |             | 1190         | Rocking (NH <sub>3</sub> <sup>+</sup> ), Rocking (CH)(OH), ring deformations <sup>(a)</sup>                           |
| 1247, 1273, 1295 |                                           |             | 1253         | Stretching (C-N), bending (N-H), stretching (CC)                                                                      |
|                  | 1368                                      | 1362        |              | Wagging CH <sub>2</sub> , rocking CH, OH plane bending of aromatic CCH, Rocking (NH), ring deformation <sup>(a)</sup> |
|                  |                                           |             |              | bending CH <sub>3</sub> , OH and C=C                                                                                  |
| 1447             | 1433                                      |             | 1436, 1461   | stretching, rocking (NH)(CH), ring deformation <sup>(a)</sup>                                                         |
| 1522, 1547       | 1543                                      | 1531, 1555  | 1537         | C=C stretching, rocking (NH)(CH), scissoring (NH <sub>2</sub> ), rocking (NH) <sup>(a)</sup>                          |
| 1617             | 1615                                      | 1617        | 1617         | C=C stretching, Scissoring (NH <sub>2</sub> ), rocking (NH) <sup>(a)</sup>                                            |

(a) Castillo, J.J.; Rozo, C.E.; Bertel, L.; Rindzevicius, T.; Mendez-Sanchez, S.C.; Martínez Ortégac, F.; Boisen, A. *J. Braz. Chem. Soc.*, **2016**, *27*, 971-977.
